# Supplementary material for: Sulphur vs NH Group: Effects on the CO2 Electroreduction Capability of Phenylenediamine-Cp Cobalt Complexes
Source: MDPI journal article supplement (doi:10.3390/molecules28052364), 2023-03-04
Supplement: s1 [file s1]

## SUPPORTING INFORMATION

# Sulphur vs NH Group: Effects on the CO<sub>2</sub> Electroreduction Capability of Phenylenediamine-Cp Cobalt Complexes

Nicola Melis <sup>1</sup>, Francesca Mocci <sup>2</sup>, Annalisa Vacca <sup>1</sup> and Luca Pilia <sup>1,\*</sup>

<sup>1</sup> Dipartimento di Ingegneria Meccanica, Chimica e dei Materiali (DIMCM), Università degli Studi di Cagliari, Via Marengo 2, 09123 Cagliari, Italy

<sup>2</sup> Dipartimento di Scienze Chimiche e Geologiche, Università di Cagliari, S.S. 554 km 4.500, 09042 Monserrato, Italy

\* Correspondence: luca.pilia@unica.it

## SUMMARY

|                                                                                                                                                                                                                                 |   |
|---------------------------------------------------------------------------------------------------------------------------------------------------------------------------------------------------------------------------------|---|
| <b>Figure S1</b> – Plot of oxidation (red) and reduction (blue) <b>current densities</b> vs $(\nu)^{1/2}$ for complex I. .                                                                                                      | 3 |
| <b>Figure S2</b> – Graph $E_p-E_{1/2}$ vs $\ln(1/\nu)$ for derivative II. ....                                                                                                                                                  | 4 |
| <b>Figure S3</b> – CV of TBAPF <sub>6</sub> /DMSO 0.1 M under N <sub>2</sub> (solid blue line) and CO <sub>2</sub> (solid red line). CVs of complex I under the same conditions are reported for comparison (dotted lines)..... | 5 |
| <b>Figure S4</b> – CV of complex I at different scan rates. Current densities <b>J</b> are normalized by the square root of the scan rate. ....                                                                                 | 6 |
| <b>Figure S5</b> – CVs of complex II at different scan rates.....                                                                                                                                                               | 7 |

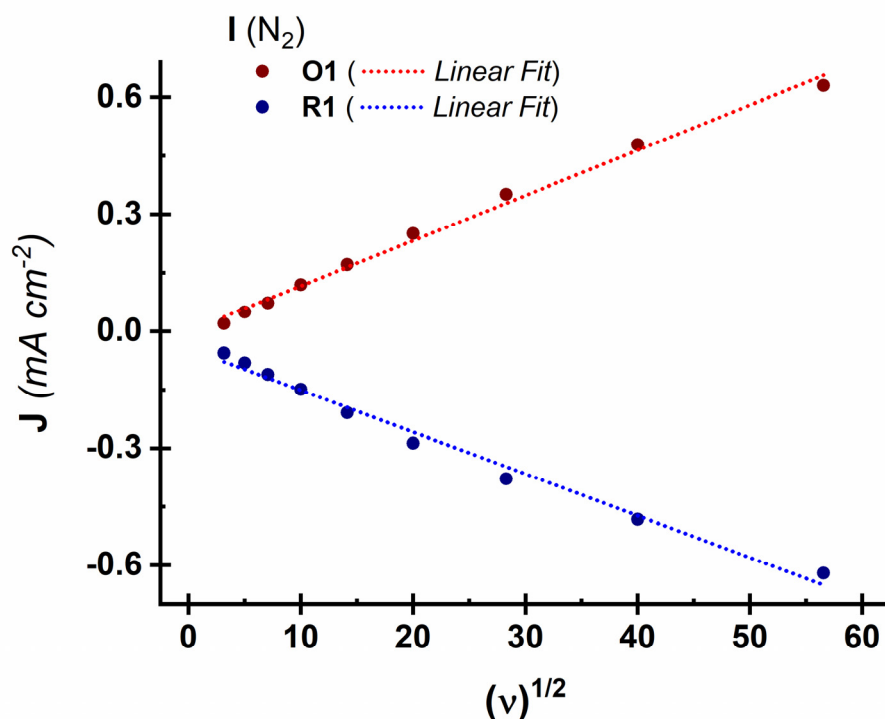

**Figure S1** – Plot of oxidation (red) and reduction (blue) current densities vs  $(v)^{1/2}$  for complex I.

#### KF CALCULATION

The rate constant  $k_f$  of the chemical step for compound II was determined using eq S1,[1] which correlates the potential shift occurring at different scan rates with the rate constant  $k_f$ .

$$(Eq. S1) \quad E_p = E_{\frac{1}{2}} - 0,78 \frac{RT}{nF} + \frac{RT}{2nF} \ln \left( k_f \frac{RT}{nF} \right) + \frac{RT}{2nF} \ln \left( \frac{1}{v} \right)$$

Then, plotting the difference  $E_p - E_{1/2}$  vs  $\ln(1/n)$ , the value of the rate constant can be determined from the intercept of the linear fit. Data points for  $\ln(1/n) > 2$  have

been excluded from the linear fit, as the reversibility is already reached. According to **eq. 1**, the plot in Figure S2 is expected to have a slope of 12.8 mV for single-electron processes. In the case of complex **II**, the observed slope is  $13.4 \pm 1.6$  mV for scan rates ranged between 0.2 and 3.2 V s<sup>-1</sup>; an intercept of 0.05883 led to a **k<sub>f</sub>** of **1.90 s<sup>-1</sup>** and, consequently, a **t<sub>1/2</sub>** equal to **364.8 s** for compound **II**.

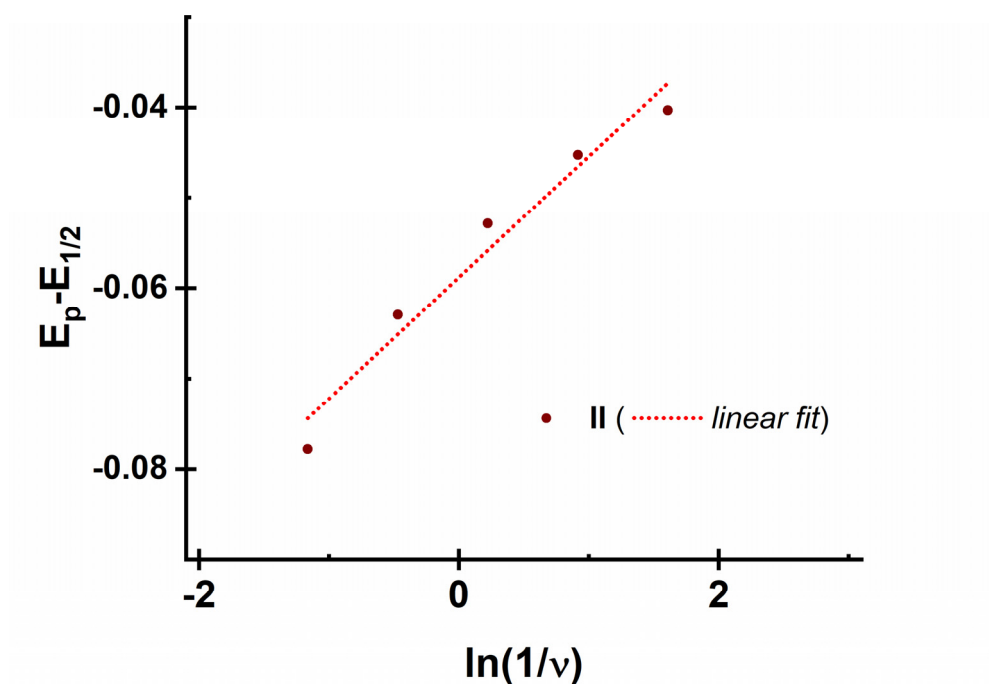

**Figure S2** – Graph  $E_p - E_{1/2}$  vs  $\ln(1/v)$  for derivative **II**.

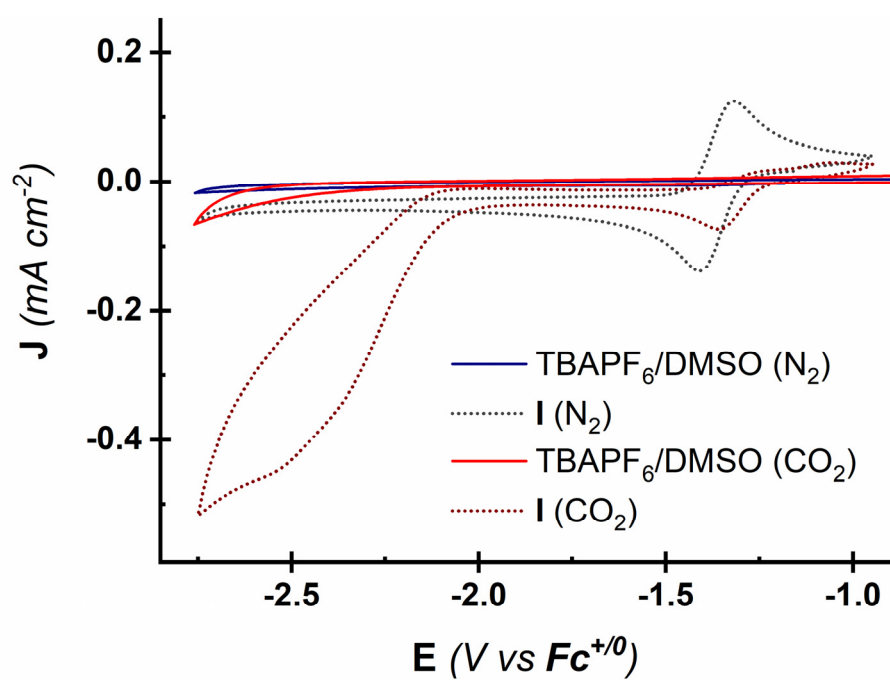

**Figure S3** – CV of TBAPF<sub>6</sub>/DMSO 0.1 M under  $\text{N}_2$  (solid blue line) and  $\text{CO}_2$  (solid red line). CVs of complex I under the same conditions are reported for comparison (dotted lines).

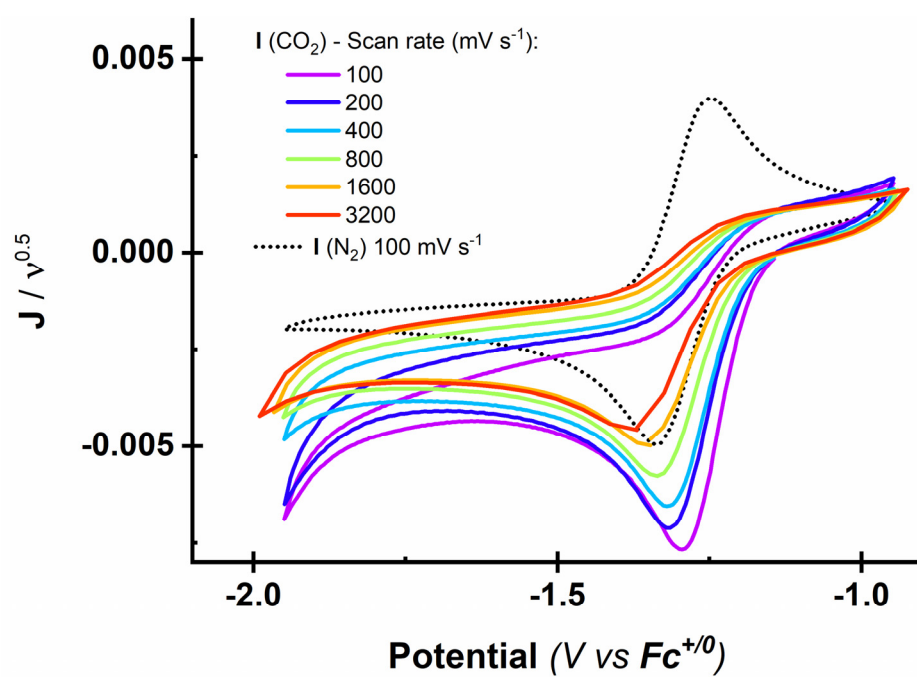

**Figure S4** – CV of complex I at different scan rates. Current densities **J** are normalized by the square root of the scan rate.

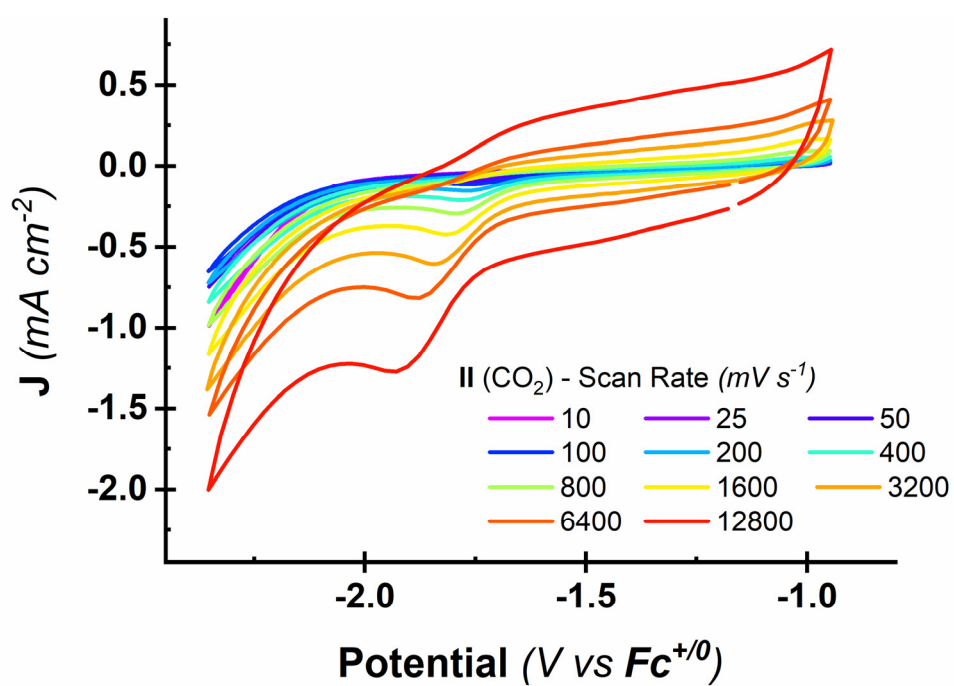

**Figure S5** – CVs of complex II at different scan rates.

## Reference

- [1] R.S. Nicholson, I. Shain, Theory of Stationary Electrode Polarography, Anal. Chem. 36 (1964) 1212–1212. <https://doi.org/10.1021/ac60213a053>.
